# Supplementary material for: Development of a Nomogram to Estimate the 60-Day Probability of Death or Culling Due to Severe Clinical Mastitis in Dairy Cows at First Veterinary Clinical Evaluation
Source: MDPI journal article supplement (doi:10.3390/vetsci10040268), 2023-04-01
Supplement: s1 [file s1]

Supplementary material

**Figure S1:** Simple tutorial on nomogram usage

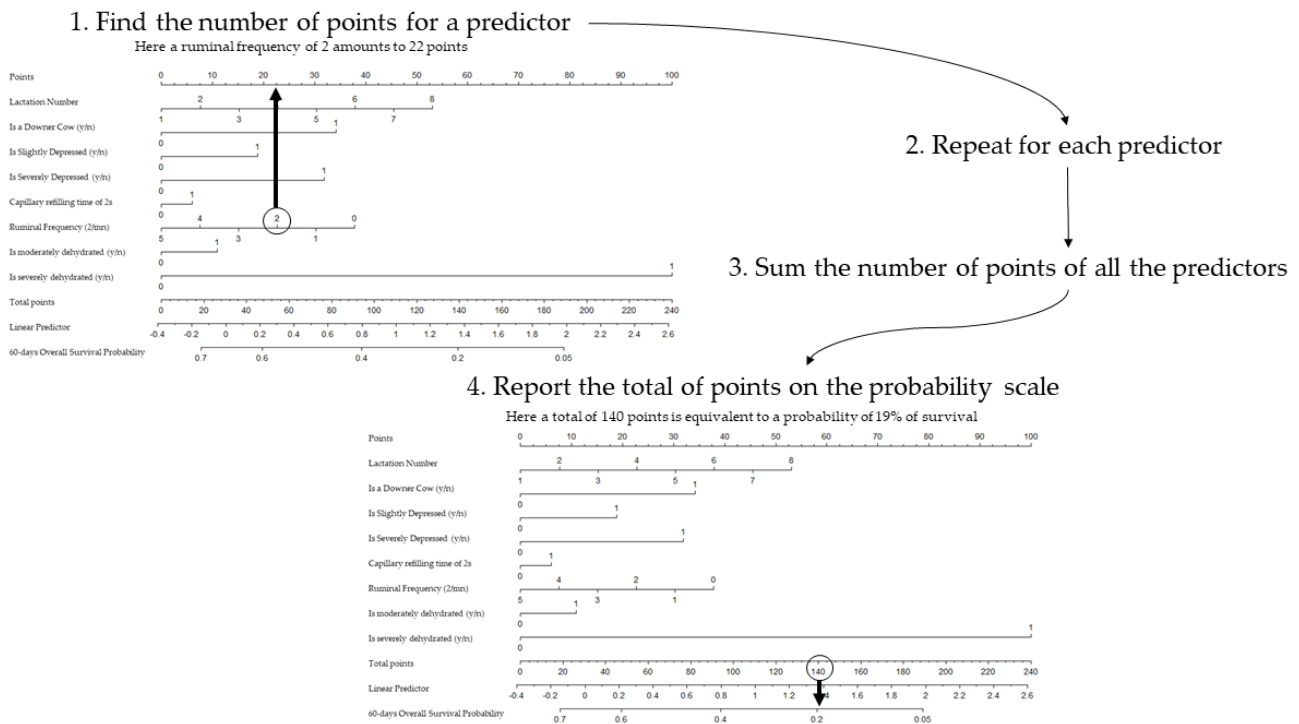

Figure S2: TRIPOD checklist

| Section/Topic                | Item | Checklist Item                                                                                                                                                                                            | Page      |
|------------------------------|------|-----------------------------------------------------------------------------------------------------------------------------------------------------------------------------------------------------------|-----------|
| <b>Title and abstract</b>    |      |                                                                                                                                                                                                           |           |
| Title                        | 1    | D;V Identify the study as developing and/or validating a multivariable prediction model, the target population, and the outcome to be predicted.                                                          | 1         |
| Abstract                     | 2    | D;V Provide a summary of objectives, study design, setting, participants, sample size, predictors, outcome, statistical analysis, results, and conclusions.                                               | 1         |
| <b>Introduction</b>          |      |                                                                                                                                                                                                           |           |
| Background and objectives    | 3a   | D;V Explain the medical context (including whether diagnostic or prognostic) and rationale for developing or validating the multivariable prediction model, including references to existing models.      | 2-3       |
|                              | 3b   | D;V Specify the objectives, including whether the study describes the development or validation of the model or both.                                                                                     | 3         |
| <b>Methods</b>               |      |                                                                                                                                                                                                           |           |
| Source of data               | 4a   | D;V Describe the study design or source of data (e.g., randomized trial, cohort, or registry data), separately for the development and validation data sets, if applicable.                               | 3         |
|                              | 4b   | D;V Specify the key study dates, including start of accrual; end of accrual; and, if applicable, end of follow-up.                                                                                        | 3         |
| Participants                 | 5a   | D;V Specify key elements of the study setting (e.g., primary care, secondary care, general population) including number and location of centres.                                                          | 3         |
|                              | 5b   | D;V Describe eligibility criteria for participants.                                                                                                                                                       | 3         |
|                              | 5c   | D;V Give details of treatments received, if relevant.                                                                                                                                                     | Figure S2 |
| Outcome                      | 6a   | D;V Clearly define the outcome that is predicted by the prediction model, including how and when assessed.                                                                                                | 4         |
|                              | 6b   | D;V Report any actions to blind assessment of the outcome to be predicted.                                                                                                                                | 4         |
| Predictors                   | 7a   | D;V Clearly define all predictors used in developing or validating the multivariable prediction model, including how and when they were measured.                                                         | 4         |
|                              | 7b   | D;V Report any actions to blind assessment of predictors for the outcome and other predictors.                                                                                                            | 4         |
| Sample size                  | 8    | D;V Explain how the study size was arrived at.                                                                                                                                                            | 3         |
| Missing data                 | 9    | D;V Describe how missing data were handled (e.g., complete-case analysis, single imputation, multiple imputation) with details of any imputation method.                                                  | 5         |
| Statistical analysis methods | 10a  | D Describe how predictors were handled in the analyses.                                                                                                                                                   | 5         |
|                              | 10b  | D Specify type of model, all model-building procedures (including any predictor selection), and method for internal validation.                                                                           | 5         |
|                              | 10c  | V For validation, describe how the predictions were calculated.                                                                                                                                           | 6         |
|                              | 10d  | D;V Specify all measures used to assess model performance and, if relevant, to compare multiple models.                                                                                                   | 6         |
|                              | 10e  | V Describe any model updating (e.g., recalibration) arising from the validation, if done.                                                                                                                 |           |
| Risk groups                  | 11   | D;V Provide details on how risk groups were created, if done.                                                                                                                                             |           |
| Development vs. validation   | 12   | V For validation, identify any differences from the development data in setting, eligibility criteria, outcome, and predictors.                                                                           |           |
| <b>Results</b>               |      |                                                                                                                                                                                                           |           |
| Participants                 | 13a  | D;V Describe the flow of participants through the study, including the number of participants with and without the outcome and, if applicable, a summary of the follow-up time. A diagram may be helpful. | 6-7       |
|                              | 13b  | D;V Describe the characteristics of the participants (basic demographics, clinical features, available predictors), including the number of participants with missing data for predictors and outcome.    | 7         |
|                              | 13c  | V For validation, show a comparison with the development data of the distribution of important variables (demographics, predictors and outcome).                                                          |           |
| Model development            | 14a  | D Specify the number of participants and outcome events in each analysis.                                                                                                                                 | 7-9       |
|                              | 14b  | D If done, report the unadjusted association between each candidate predictor and outcome.                                                                                                                | 7-9       |
| Model specification          | 15a  | D Present the full prediction model to allow predictions for individuals (i.e., all regression coefficients, and model intercept or baseline survival at a given time point).                             | 9         |
|                              | 15b  | D Explain how to use the prediction model.                                                                                                                                                                | 9         |
| Model performance            | 16   | D;V Report performance measures (with CIs) for the prediction model.                                                                                                                                      | 10-12     |
| Model-updating               | 17   | V If done, report the results from any model updating (i.e., model specification, model performance).                                                                                                     |           |
| <b>Discussion</b>            |      |                                                                                                                                                                                                           |           |
| Limitations                  | 18   | D;V Discuss any limitations of the study (such as nonrepresentative sample, few events per predictor, missing data).                                                                                      | 13-14     |
| Interpretation               | 19a  | V For validation, discuss the results with reference to performance in the development data, and any other validation data.                                                                               |           |
|                              | 19b  | D;V Give an overall interpretation of the results, considering objectives, limitations, results from similar studies, and other relevant evidence.                                                        | 13-14     |
| Implications                 | 20   | D;V Discuss the potential clinical use of the model and implications for future research.                                                                                                                 | 13-14     |
| <b>Other information</b>     |      |                                                                                                                                                                                                           |           |
| Supplementary information    | 21   | D;V Provide information about the availability of supplementary resources, such as study protocol, Web calculator, and data sets.                                                                         | 15        |
| Funding                      | 22   | D;V Give the source of funding and the role of the funders for the present study.                                                                                                                         | 15        |

**Table S1:** Descriptive statistics by survival status, and univariable analysis of treatments of dairy cows coming from 124 herds in Québec, Canada with severe clinical mastitis in the 60-day period following a veterinary clinical evaluation. Statistical test was computed only between survival groups.

|                                 | N   | Overall,<br>N = 222 <sup>1</sup> | Survival,<br>N = 110 <sup>1</sup> | Non-survival,<br>N = 112 <sup>1</sup> | p-value <sup>2</sup> |
|---------------------------------|-----|----------------------------------|-----------------------------------|---------------------------------------|----------------------|
| <b>Calcium</b>                  | 215 | 114 (53%)                        | 51 (49%)                          | 63 (57%)                              | 0.2                  |
| <b>Aminolean™</b>               | 215 | 2 (1%)                           | 0 (0%)                            | 2 (2%)                                | 0.5                  |
| <b>Dextrose 50%</b>             | 215 | 10 (5%)                          | 6 (6%)                            | 4 (4%)                                | 0.5                  |
| <b>Isotonic fluids</b>          | 215 | 20 (9%)                          | 7 (7%)                            | 13 (12%)                              | 0.2                  |
| <b>Hypertonic fluids</b>        | 215 | 155 (72%)                        | 80 (76%)                          | 75 (68%)                              | 0.2                  |
| <b>Oral fluids</b>              | 215 | 15 (7%)                          | 8 (8%)                            | 7 (6%)                                | 0.7                  |
| <b>Anti-inflammatories</b>      | 218 |                                  |                                   |                                       | 0.6                  |
| No treatment                    |     | 9 (4%)                           | 3 (3%)                            | 6 (5%)                                |                      |
| Aspirin                         |     | 1 (1%)                           | 1 (1%)                            | 0 (0%)                                |                      |
| Dexamethasone                   |     | 3 (2%)                           | 1 (1%)                            | 2 (2%)                                |                      |
| Flunixin                        |     | 191 (88%)                        | 97 (91%)                          | 94 (85%)                              |                      |
| Ketoprofen                      |     | 11 (5%)                          | 5 (5%)                            | 6 (5%)                                |                      |
| Meloxicam                       |     | 2 (1%)                           | 0 (0%)                            | 2 (2%)                                |                      |
| Phenylbutazone                  |     | 1 (1%)                           | 0 (0%)                            | 1 (1%)                                |                      |
| <b>Systemic Antimicrobial</b>   | 217 |                                  |                                   |                                       | 0.035                |
| No treatment                    |     | 5 (2%)                           | 3 (3%)                            | 2 (2%)                                |                      |
| Ampicillin                      |     | 1 (1%)                           | 0 (0%)                            | 1 (1%)                                |                      |
| Oxytetracyclin                  |     | 39 (18%)                         | 20 (19%)                          | 19 (17%)                              |                      |
| Penicillin                      |     | 2 (1%)                           | 0 (0%)                            | 2 (2%)                                |                      |
| Penicillin & TMS <sup>3</sup>   |     | 7 (3%)                           | 0 (0%)                            | 7 (6%)                                |                      |
| Sulfadoxine Trimetoprim         |     | 163 (75%)                        | 83 (78%)                          | 80 (72%)                              |                      |
| <b>Intrammary Antimicrobial</b> | 213 |                                  |                                   |                                       | 0.8                  |
| No treatment                    |     | 27 (13%)                         | 14 (13%)                          | 13 (12%)                              |                      |
| Cefalak™                        |     | 4 (2%)                           | 1 (1%)                            | 3 (3%)                                |                      |
| Erythro 36™                     |     | 2 (1%)                           | 2 (2%)                            | 0 (0%)                                |                      |
| Homemade preparation            |     | 14 (7%)                          | 7 (7%)                            | 7 (7%)                                |                      |
| Pirsue™                         |     | 4 (2%)                           | 3 (3%)                            | 1 (1%)                                |                      |
| SP 17900™                       |     | 61 (29%)                         | 31 (29%)                          | 30 (28%)                              |                      |
| Spectramast LC™                 |     | 101 (47%)                        | 49 (46%)                          | 52 (49%)                              |                      |

<sup>1</sup>n (%), <sup>2</sup>Pearson's Chi-squared test; Fisher's exact test; <sup>3</sup> Sulfadoxine & Trimetoprim
